# Supplementary material for: Exploring Bioactive Compounds in Brown Seaweeds Using Subcritical Water: A Comprehensive Analysis
Source: MDPI journal article supplement (doi:10.3390/md21060328), 2023-05-26
Supplement: s1 [file s1]

# Exploring Bioactive Compounds in Brown Seaweeds Using Subcritical Water: A Comprehensive Analysis

## Supplementary Data

**Table S1.** Proximate composition (%) of three brown seaweeds used in this experiment.

| Seaweed               | Moisture                | Ash                     | Crude Lipid             | Crude Protein           | Carbohydrate            |
|-----------------------|-------------------------|-------------------------|-------------------------|-------------------------|-------------------------|
| <i>S. thunbergii</i>  | 9.75±0.17 <sup>b</sup>  | 26.02±0.34 <sup>a</sup> | 13.64±0.13 <sup>a</sup> | 1.01±0.15 <sup>c</sup>  | 49.58±0.02 <sup>c</sup> |
| <i>U. pinnatifida</i> | 5.33±1.33 <sup>bc</sup> | 20.62±0.98 <sup>b</sup> | 1.15±0.87 <sup>b</sup>  | 18.33±0.43 <sup>a</sup> | 54.57±0.12 <sup>b</sup> |
| <i>S. japonica</i>    | 10.44±0.14 <sup>a</sup> | 16.79±0.98 <sup>c</sup> | 1.38±0.19 <sup>b</sup>  | 8.53±0.22 <sup>b</sup>  | 62.87±0.94 <sup>a</sup> |

- Values are expressed as mean ± SD.
- Different letters indicate significant differences ( $p<0.05$ ) according to Duncan's multiple range test.

**Table S2.** Pearson's correlation coefficients of MRPs and sugar contents.

| Trait     | a294 | a420    | a294/a420 | TSC                 | RSC                |
|-----------|------|---------|-----------|---------------------|--------------------|
| a294      | 1    | 0.987** | -0.936**  | 0.451 <sup>ns</sup> | 0.761 <sup>*</sup> |
| a420      | -    | 1       | -0.980**  | 0.580 <sup>ns</sup> | 0.841**            |
| a294/a420 | -    |         | 1         | -0.720 <sup>*</sup> | -0.914**           |

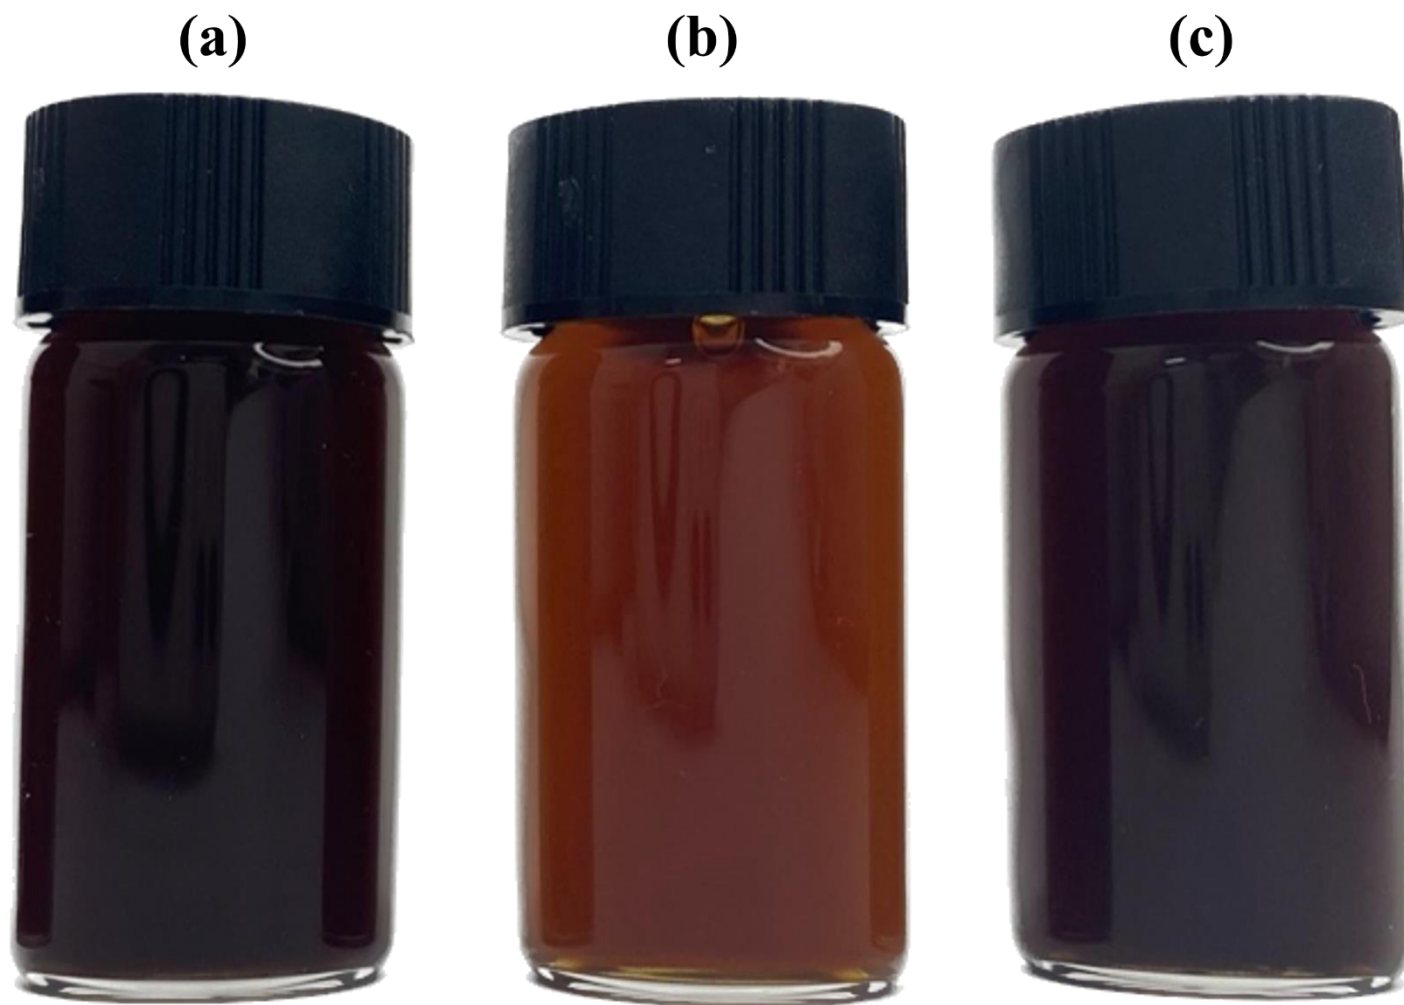

**Figure S1.** Visual appearance of 3 types of brown seaweeds extracts obtained using subcritical water ( a: *S. thunbergii*, b: *U. pinnatifida*, c: *S. japonica* ).

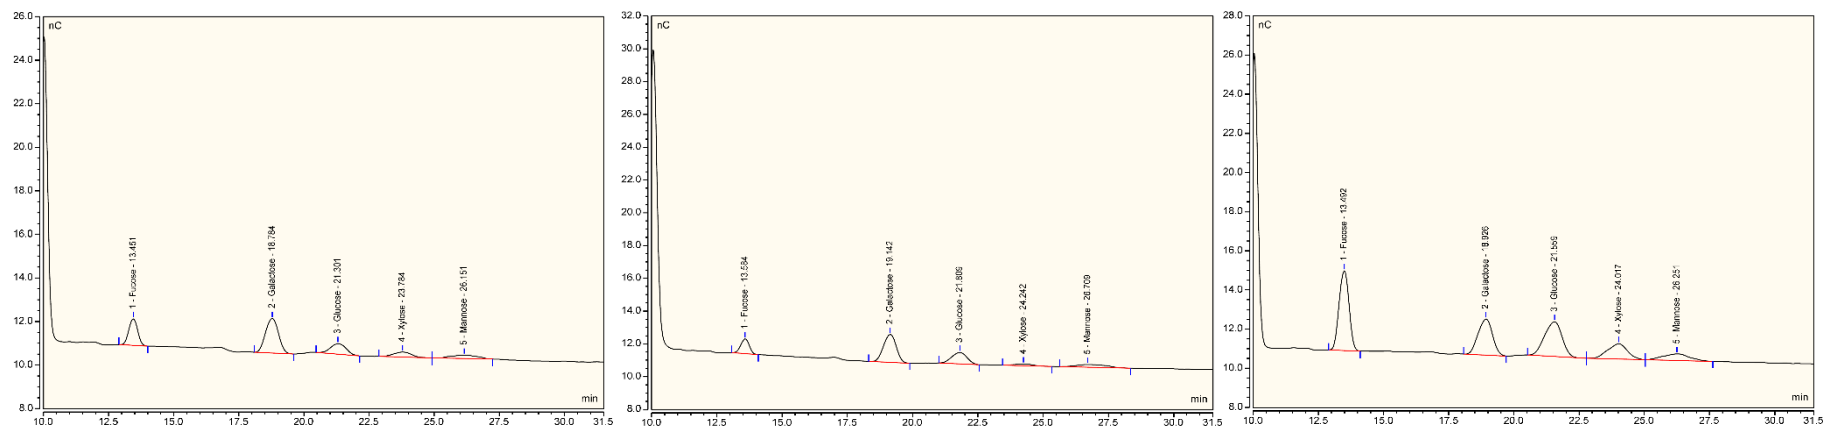

**Figure S2.** Monosaccharides composition chromatograms of BSEs.

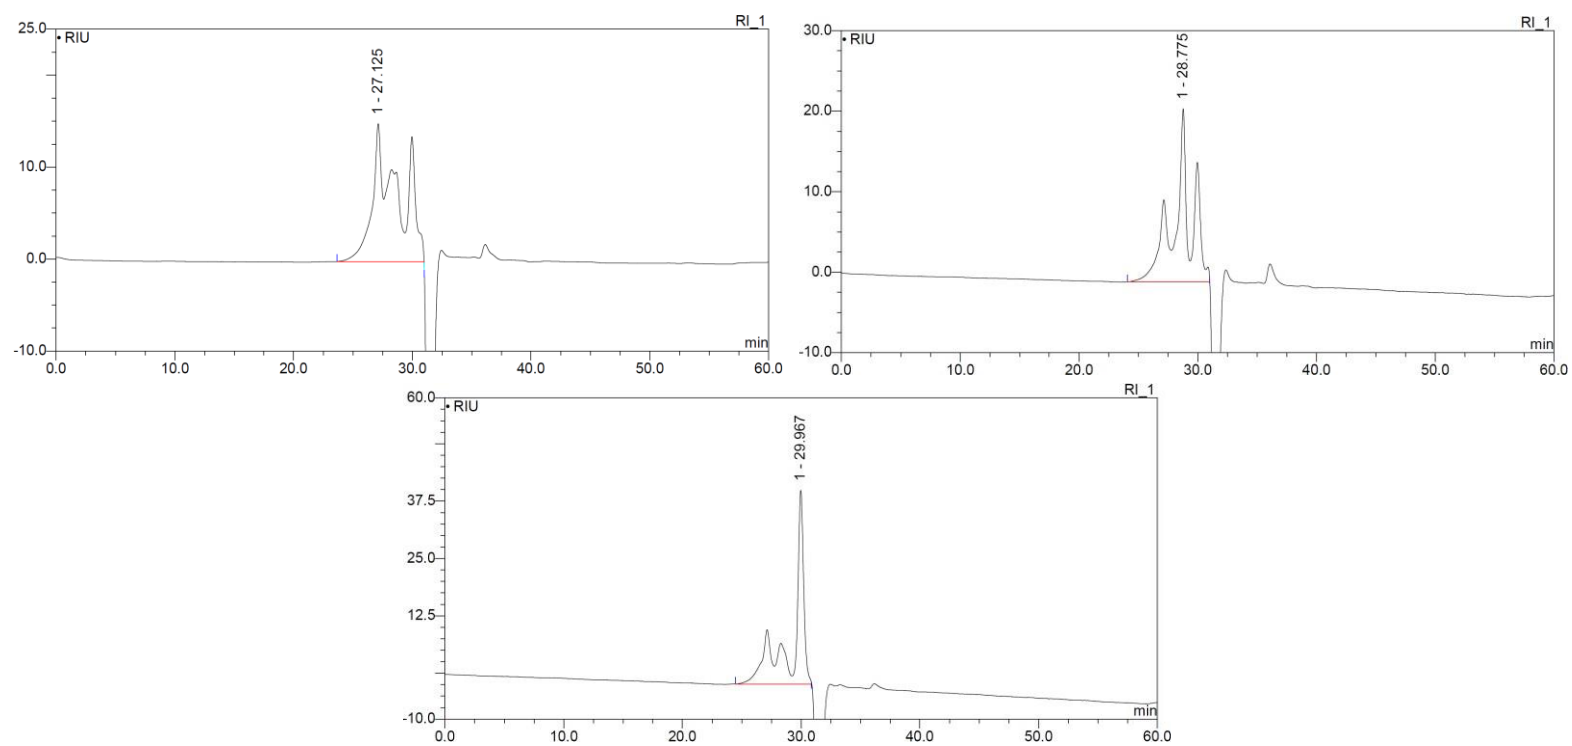

**Figure S3.** GPC Chromatogram of BSE.
